# Supplementary material
Source: PubMed Central journal article supplement (PMC2799890)
Supplement: 0906741106_0906741106SI.pdf [file 0906741106_0906741106SI.pdf]

# Supporting Information

Wang et al. 10.1073/pnas.0906741106

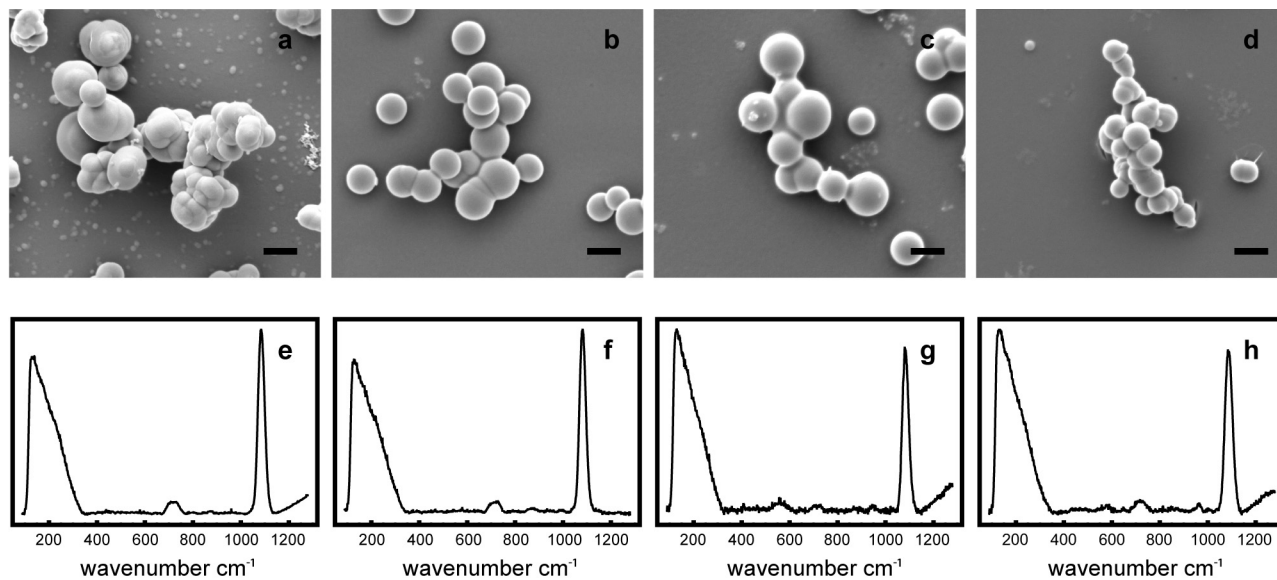

**Fig. S1.** SEM images of particles produced from solutions with a Mg/Ca ratio of 4.0 with no impurities (A), 0.025 M aspartic acid (B), 0.025 M glutamic acid (C), and 0.025 M oxydiacetic acid (D). (Scale bars, 1  $\mu\text{m}$ .) Particles have smooth and spherical morphologies indicative of amorphous carbonates. These samples were prepared by precipitation onto glass slides and coated with 8-nm Pd-Au and then imaged by using a FEI Quanta field emission scanning electron microscope, operated at 5 kV. Raman spectra of particles produced from solutions with a Mg/Ca ratio of 4.0 that contained no impurities (E), 0.025 M aspartic acid (F), 0.025 M glutamic acid (G), and 0.025 M oxydiacetic acid (H). All of the spectra show peak broadening of  $\nu_1$  ( $\approx 1085\text{ cm}^{-1}$ ) and  $\nu_4$  ( $\approx 714\text{ cm}^{-1}$ ) and the absence of lattice modes at ( $\approx 155\text{ cm}^{-1}$ ) and ( $\approx 270\text{ cm}^{-1}$ ) that is characteristic of amorphous carbonates. Spectra were collected on a JY Horiba LabRam HR equipped with a 632-nm HeNe laser using an Olympus 100 $\times$  objective (N.A. = 0.9). Collection times of 300 s were used.

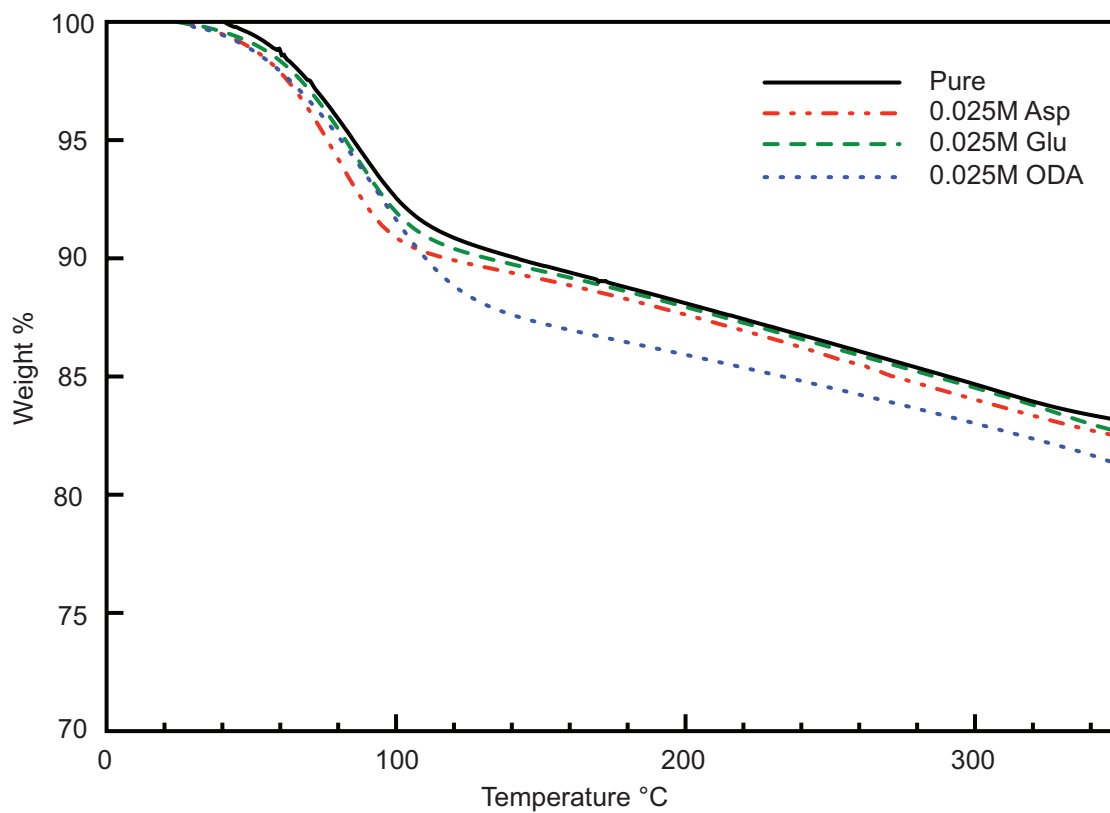

**Fig. S2.** Thermogravimetric analysis performed on a TA-TGA 2950 of particles filtered from solutions with a Mg/Ca ratio of 4.0, washed in ethanol, and dried under vacuum overnight. The amorphous calcium carbonate prepared in solutions without impurities (Pure), 0.025 M aspartic acid (Asp), and 0.025 M glutamic (Glu) yielded particles with  $\approx 14\%$  weight loss between room temperature and 250 °C. In solutions with 0.025 M oxydiacetic acid (ODA) particles show an  $\approx 15.5\%$  weight loss between room temperature and 250 °C. The data demonstrate a stoichiometry of approximately one water molecule per calcium carbonate.
